# Supplementary material
Source: PubMed Central journal article supplement (PMC3434346)
Supplement: cr201261x1.pdf [file cr201261x1.pdf]

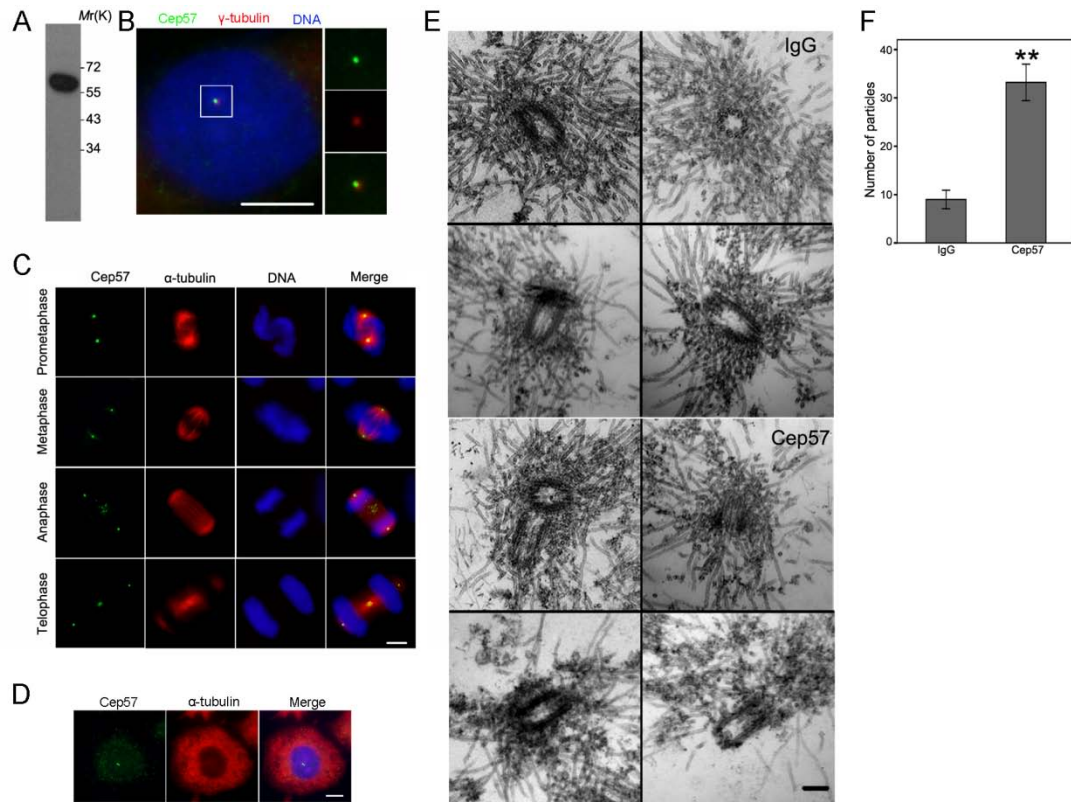

**Figure S1** Cep57 is a PCM component. **(A)** Immunoblotting of HeLa cell lysates using anti-Cep57 antibody. **(B)** The immunofluorescence image shows the co-localization of Cep57 (green) and  $\gamma$ -tubulin (red). Boxed regions showing higher magnification images of the centrosome. Bar, 5  $\mu$ m. **(C)** Immunostaining of HeLa cells at different mitosis stages for Cep57 (green) and  $\alpha$ -tubulin (red). Bar, 5  $\mu$ m. **(D)** The centrosome localization of Cep57 is microtubule-independent. HeLa cells were treated with nocodazole to depolymerize the microtubule network and then immunostained with Cep57 (green) and  $\alpha$ -tubulin (red). Bar, 5  $\mu$ m. **(E)** Immunoelectron microscopy images of HeLa cell centrosomes. Negative control, mouse normal IgG. Bar, 100 nm. **(F)** The graph shows the number of golden particles around the centriole within an area of  $1.5\mu\text{m}^2$ . A minimum of 15 cells was counted per sample. Error bars represent mean  $\pm$  SEM. \*\*  $P < 0.001$ , unpaired Student's  $t$ -test.
