# Supplementary material
Source: PubMed Central journal article supplement (PMC3434346)
Supplement: cr201261x2.pdf [file cr201261x2.pdf]

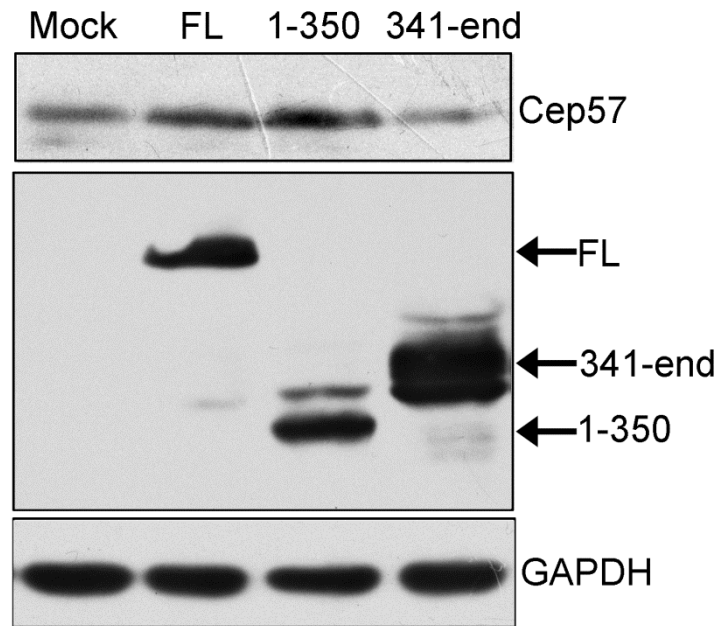

**Figure S2** Overexpression of NEDD1 increases the protein level of Cep57. HeLa cell lysates expressing Myc-NEDD1 full-length (FL), Myc-NEDD1-NTD (1-350) or Myc-NEDD1-CTD (341-end) were subjected to immunoblotting with anti-Cep57 and Myc antibodies. GAPDH was used as a loading control.
