# Supplementary material
Source: PubMed Central journal article supplement (PMC3434346)
Supplement: cr201261x7.pdf [file cr201261x7.pdf]

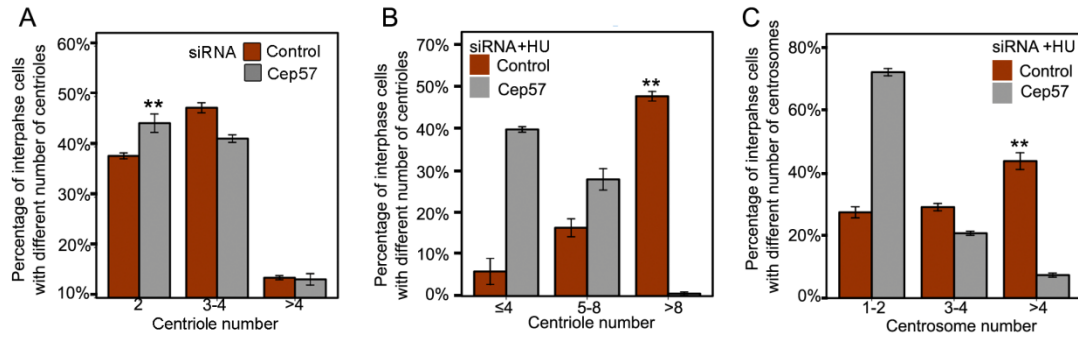

**Figure S3** Cep57 depletion suppresses centriole over-duplication. **(A)** The graph shows the percentage of siRNA-transfected CHO cells with different numbers of centrioles. A minimum of 200 cells was counted per sample in three independent experiments. Error bars represent mean  $\pm$  SEM. \*\*  $P = 0.002$ , unpaired Student's  $t$ -test. **(B and C)** The graphs show the percentage of HU-treated CHO cells with different numbers of centrioles **(B)** or centrosomes **(C)**. A minimum of 200 cells was counted per sample in three independent experiments. Error bars represent mean  $\pm$  SEM. \*\*  $P < 0.001$ , unpaired Student's  $t$ -test.
