# Supplementary material
Source: PubMed Central journal article supplement (PMC3434346)
Supplement: cr201261x9.pdf [file cr201261x9.pdf]

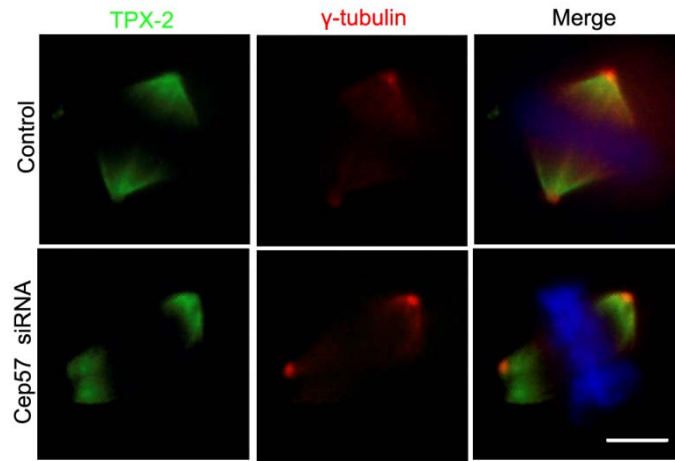

**Figure S5** Control siRNA and Cep57 siRNA treated cells were stained for TPX-2 (green),  $\gamma$ -tubulin (red) and DNA (blue). Bar, 5  $\mu$ m.
